# Supplementary material
Source: PubMed Central journal article supplement (PMC5101447)
Supplement: cmi201573x1.pdf [file cmi201573x1.pdf]

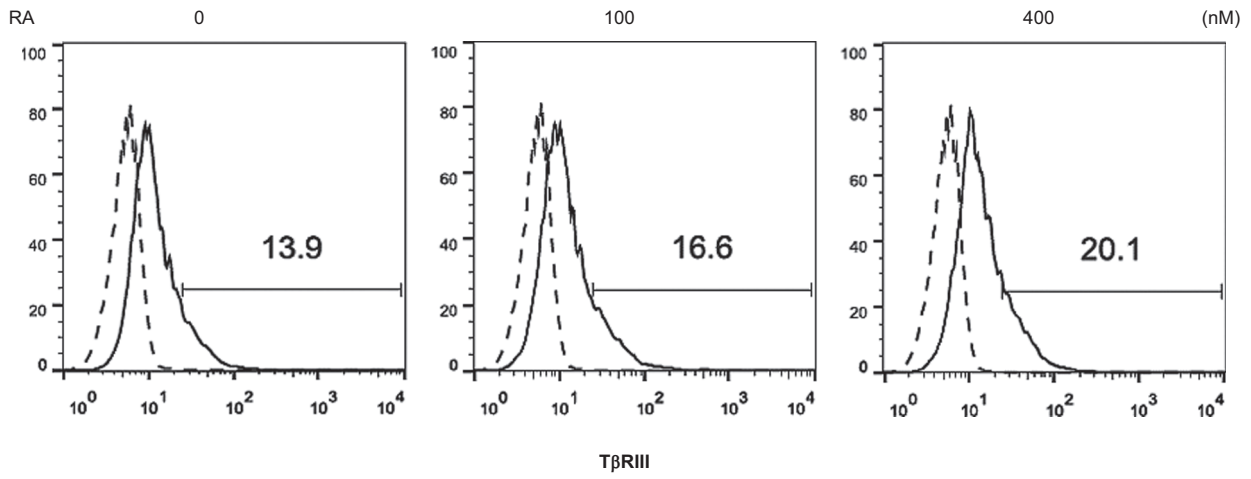

**Supplementary Figure 1** Effect of RA on the expression of surface betaglycan (TβRIII). Normal spleen B cells were cultured with LPS ( $12.5 \mu\text{g ml}^{-1}$ ) and RA (100, 400 nM). After 4 days of culture, surface betaglycan expression was analyzed by FACS. RA, retinoic acid.

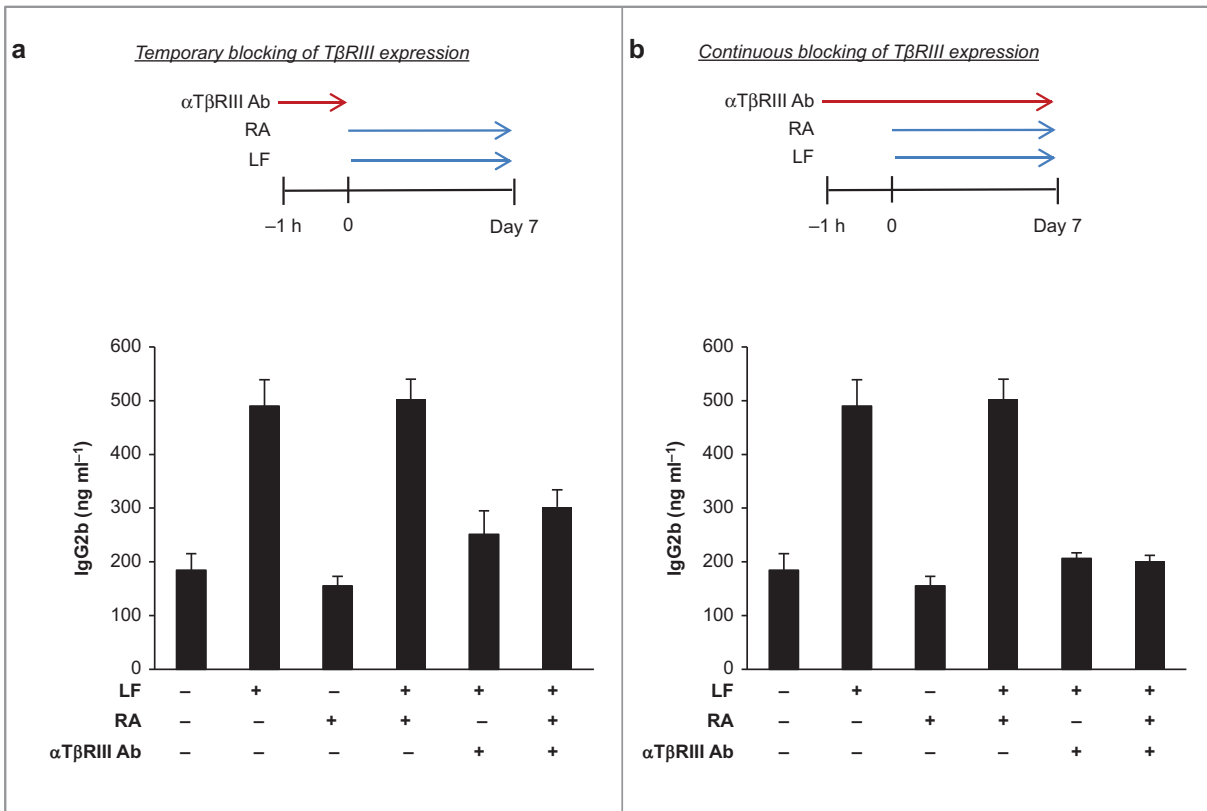

**Supplementary Figure 2** Effect of anti-TβRIII Ab treatment on IgG2b production by LF and RA. Normal spleen B cells were cultured with LPS ( $12.5 \mu\text{g ml}^{-1}$ ), LF ( $120 \mu\text{g ml}^{-1}$ ), and RA ( $100 \text{ nM}$ ). Anti-TβRIII Ab ( $5 \mu\text{g ml}^{-1}$ ) was added for the periods as indicated in panels **a** and **b**. After 7 days of culture, level of IgG2b was determined by ELISA. LF, lactoferrin; RA, retinoic acid.

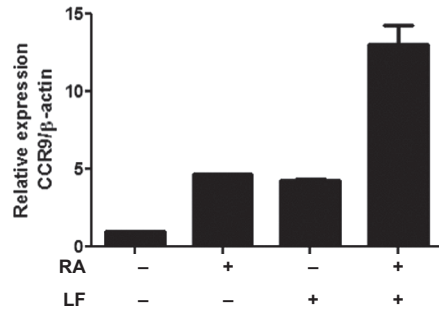

**Supplementary Figure 3** LF and RA synergize to induce expression of CCR9. Normal spleen B cells were cultured with LPS ( $12.5 \mu\text{g ml}^{-1}$ ), LF ( $60 \mu\text{g ml}^{-1}$ ), and RA (25 nM). After 3 days of culture, total RNA was isolated, and levels of CCR9 were measured by q-PCR. LF, lactoferrin; RA, retinoic acid.

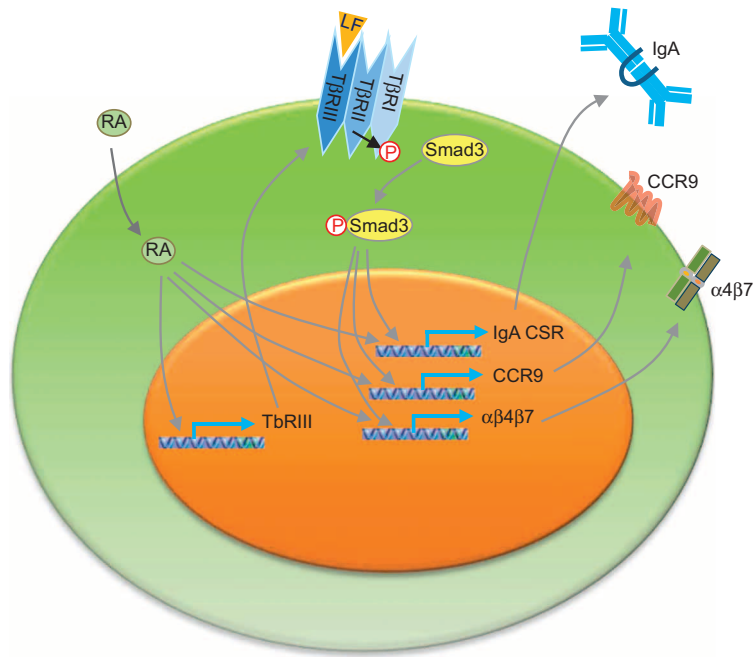

**Supplementary Figure 4** Possible mechanisms by which LF and RA synergize to enhance overall gut IgA immunity. LF increases expression of IgA, CCR9, and  $\alpha 4\beta 7$  through T $\beta$ RIII binding and activating canonical TGF- $\beta$  signaling. Meanwhile, it is highly plausible that RA increases not only the expression of these target genes through RAR directly but also enhances LF-mediated IgA/CCR9/ $\alpha 4\beta 7$  expression through the induction of T $\beta$ RIII indirectly. LF, lactoferrin; RA, retinoic acid.
